# Supplementary material for: Hospital-level variation in practices and outcomes for patients with severe acute exacerbations of idiopathic pulmonary fibrosis: a retrospective multicentre cohort study
Source: PubMed Central journal article supplement — BMJ Open Respir Res. 2023 Apr 19;10(1):e001593. doi: 10.1136/bmjresp-2022-001593 (PMC10124258; doi:10.1136/bmjresp-2022-001593), 2023-04-19
Supplement: bmjresp-2022-001593supp001.pdf [file bmjresp-2022-001593supp001.pdf]

**SUPPLEMENTAL MATERIAL****Hospital-level Variation in Idiopathic Pulmonary Fibrosis Outcomes and Practices in the Intensive Care Unit**Divya Shankar MD<sup>1</sup>, Allan Walkey MD MSc<sup>1</sup>, Finn Hawkins MBBCh<sup>1</sup>, Daniel Peterson MS<sup>1</sup>, Anica Law MD MS<sup>1</sup>

## Affiliations:

1 - The Pulmonary Center, Boston University Chobanian &amp; Avedisian School of Medicine, Boston, MA, United States

**TABLE OF CONTENTS****Appendix 1: ICD-10 and Premier Charge Codes Used in Study**

|                                                                                                               |    |
|---------------------------------------------------------------------------------------------------------------|----|
| Supplemental Table 1: ICD-10 Codes Used for Inclusion Criteria.....                                           | 2  |
| Supplemental Table 2: ICD-10 and Premier Charge Codes Used for Exclusion Criteria .....                       | 2  |
| Supplemental Table 3: ICD-10 Codes and Premier-Charge Codes Used to Identify Practice Outcomes .....          | 3  |
| Supplemental Table 4: ICD-10 Codes and Premier-Charge Codes Used to Identify Patient Level Covariables.....   | 9  |
| Supplemental Table 5: ICD-10 Codes and Premier-Charge Codes Used to Identify Hospital Level Covariables ..... | 12 |

**Appendix 2: Formulas Used for Hierarchical Modelling**

|                                          |    |
|------------------------------------------|----|
| Median Odds Ratio .....                  | 13 |
| Intraclass Correlation Coefficient ..... | 13 |
| Proportional Change in Variance .....    | 13 |

**Appendix 3: Consort Diagram**

|                       |    |
|-----------------------|----|
| Consort Diagram ..... | 14 |
|-----------------------|----|

**Appendix 4: Associations between exposures and outcomes in severe IPF exacerbations**

|                                                                                           |    |
|-------------------------------------------------------------------------------------------|----|
| Supplemental Table 1: Adjusted Odds Ratios for Practices in Severe IPF Exacerbations..... | 15 |
| Supplemental Table 2: Adjusted Odds Ratios for Mortality in Severe IPF Exacerbations..... | 17 |

**Appendix 5: Sensitivity Analysis with Primary or Admitting Diagnosis of IPF (J84.111 or J84.112).....**19

## Appendix 1: ICD-10 Codes and Premier Charge Codes Used in Study

### I. Supplemental Table 1: ICD-10 Codes Used for Inclusion Criteria

| Description                                                                                                | ICD-10 Code                                                                                         |
|------------------------------------------------------------------------------------------------------------|-----------------------------------------------------------------------------------------------------|
| Admission or principle diagnosis of IPF (idiopathic interstitial pneumonia, idiopathic pulmonary fibrosis) | J84.111, J84.112                                                                                    |
| Admission or principle diagnosis of acute or chronic respiratory failure + IPF as secondary                | J96x + J84.11 OR J84.112                                                                            |
| Admission or principle diagnosis Pneumonia + IPF                                                           | J09.x , J10.x, J11.x, J12.x, J13.x, J14.x, J15.x, J16.x, J17.x, J18.x, OR J22.x + J84.11 OR J84.112 |
| Admission or principle diagnosis ARDS +IPF                                                                 | J80 OR R0603 + J84.11 OR J84.112                                                                    |

### II. Supplemental Table 2: ICD-10 and Premier Charge Codes Used for Exclusion Criteria

| Diagnosis                                                                                                                                                                                                                                                                                                                                                                         | ICD-10 Code | Premier Charge Code |
|-----------------------------------------------------------------------------------------------------------------------------------------------------------------------------------------------------------------------------------------------------------------------------------------------------------------------------------------------------------------------------------|-------------|---------------------|
| Alveolar and parieto-alveolar conditions (Alveolar proteinosis, pulmonary alveolar microlithiasis, idiopathic pulmonary hemosiderosis, other alveolar and parieto-alveolar conditions)                                                                                                                                                                                            | J84.0       |                     |
|                                                                                                                                                                                                                                                                                                                                                                                   | J84.01      |                     |
|                                                                                                                                                                                                                                                                                                                                                                                   | J84.01      |                     |
|                                                                                                                                                                                                                                                                                                                                                                                   | J84.03      |                     |
|                                                                                                                                                                                                                                                                                                                                                                                   | J84.09      |                     |
| Idiopathic non-specific interstitial pneumonitis                                                                                                                                                                                                                                                                                                                                  | J84.113     |                     |
| Acute interstitial pneumonitis                                                                                                                                                                                                                                                                                                                                                    | J84.114     |                     |
| Respiratory bronchiolitis interstitial lung disease                                                                                                                                                                                                                                                                                                                               | J84.115     |                     |
| Cryptogenic organizing pneumonia                                                                                                                                                                                                                                                                                                                                                  | J84.116     |                     |
| Desquamative interstitial pneumonia                                                                                                                                                                                                                                                                                                                                               | J84.117     |                     |
| Lymphoid interstitial pneumonia                                                                                                                                                                                                                                                                                                                                                   | J84.2       |                     |
| Lymphangioliomyomatosis                                                                                                                                                                                                                                                                                                                                                           | J84.81      |                     |
| Adult pulmonary Langerhans cell histiocytosis                                                                                                                                                                                                                                                                                                                                     | J84.82      |                     |
| Surfactant mutations of the lung                                                                                                                                                                                                                                                                                                                                                  | J84.83      |                     |
| Other interstitial lung diseases of childhood (Neuroendocrine cell hyperplasia of infancy, pulmonary interstitial glycogenosis, alveolar capillary dysplasia with vein misalignments, other interstitial diseases of childhood)                                                                                                                                                   | J84.84      |                     |
|                                                                                                                                                                                                                                                                                                                                                                                   | J84.841     |                     |
|                                                                                                                                                                                                                                                                                                                                                                                   | J84.842     |                     |
|                                                                                                                                                                                                                                                                                                                                                                                   | J84.843     |                     |
|                                                                                                                                                                                                                                                                                                                                                                                   | J84.848     |                     |
| Sarcoidosis                                                                                                                                                                                                                                                                                                                                                                       | D86.0       |                     |
|                                                                                                                                                                                                                                                                                                                                                                                   | D86.2       |                     |
| Hypersensitivity pneumonitis                                                                                                                                                                                                                                                                                                                                                      | J67         |                     |
| Occupational lung injuries (Coalworker's , pneumoconiosis due to asbestos and other mineral fibers, pneumoconiosis due to dust containing silica, pneumoconiosis due to other inorganic dusts, airway disease due to specific organic dust, respiratory conditions due to inhalation of chemicals, gases, fumes and vapors, respiratory conditions due to other external agents ) | J60         |                     |
|                                                                                                                                                                                                                                                                                                                                                                                   | J61         |                     |
|                                                                                                                                                                                                                                                                                                                                                                                   | J62         |                     |
|                                                                                                                                                                                                                                                                                                                                                                                   | J63         |                     |
|                                                                                                                                                                                                                                                                                                                                                                                   | J66         |                     |
|                                                                                                                                                                                                                                                                                                                                                                                   | J68         |                     |
|                                                                                                                                                                                                                                                                                                                                                                                   | J70         |                     |
| Acute pulmonary manifestations due to radiation                                                                                                                                                                                                                                                                                                                                   | J70.0       |                     |
| Neurofibromatosis                                                                                                                                                                                                                                                                                                                                                                 | Q85.00      |                     |
| Lipidoses                                                                                                                                                                                                                                                                                                                                                                         | E75.6       |                     |
| Amyloidosis                                                                                                                                                                                                                                                                                                                                                                       | E85.9       |                     |
| Goodpasture's syndrome                                                                                                                                                                                                                                                                                                                                                            | M31.0       |                     |
| Wegner's granulomatosis                                                                                                                                                                                                                                                                                                                                                           | M31.31      |                     |
| Lupus, Lupus with pulmonary involvement                                                                                                                                                                                                                                                                                                                                           | M32         |                     |

|                                                                                                                                                                                                                       |                                                                |                                                                                                                                                                                            |
|-----------------------------------------------------------------------------------------------------------------------------------------------------------------------------------------------------------------------|----------------------------------------------------------------|--------------------------------------------------------------------------------------------------------------------------------------------------------------------------------------------|
|                                                                                                                                                                                                                       | M32.13                                                         |                                                                                                                                                                                            |
| Polymyositis, Polymyositis with respiratory involvement                                                                                                                                                               | M33.2<br>M33.21                                                |                                                                                                                                                                                            |
| Dermatopolymyositis , Dermatopolymyositis with respiratory involvement                                                                                                                                                | M33.1<br>M33.11<br>M33.9<br>M33.91                             |                                                                                                                                                                                            |
| Systemic sclerosis , Systemic sclerosis with lung involvement                                                                                                                                                         | M34<br>M34.81                                                  |                                                                                                                                                                                            |
| Rheumatoid arthritis, Rheumatoid lung disease with rheumatoid arthritis                                                                                                                                               | M05<br>M05.1                                                   |                                                                                                                                                                                            |
| Pulmonary eosinophilia ( Pulmonary eosinophilia, not elsewhere classified, chronic eosinophilic pneumonia, acute eosinophilic pneumonia, eosinophilic asthma, other pulmonary eosinophilia, not elsewhere classified) | J82<br>J82.8<br>J82.81<br>J82.21<br>J82.83<br>J82.89           |                                                                                                                                                                                            |
| Other systemic involvement of connective tissue, Sjogren's disease, other overlap syndromes                                                                                                                           | M35<br>M35.0<br>M35.1                                          |                                                                                                                                                                                            |
| Ankylosing spondylitis                                                                                                                                                                                                | M45                                                            |                                                                                                                                                                                            |
| Tuberous sclerosis                                                                                                                                                                                                    | Q85.1                                                          |                                                                                                                                                                                            |
| Chronic Obstructive Pulmonary Disease (primary or admitting diagnosis)                                                                                                                                                | J40<br>J41.x<br>J42<br>J43.x<br>J44.x                          |                                                                                                                                                                                            |
| Congestive Heart Failure (primary or admitting diagnosis)                                                                                                                                                             | I11.0<br>I13.0<br>I50.1<br>I50.2x<br>I50.3x<br>I50.4x<br>I50.9 |                                                                                                                                                                                            |
| Lung Transplant during days 0-2 of admission                                                                                                                                                                          | OBYK0Z0<br>OBYK0Z1<br>OBYL0Z0<br>OBYL0Z1<br>OBYM0Z0<br>OBYM0Z1 | 360490328510000<br>360490328520000<br>360490328530000<br>360490328540000<br>360490339350000<br>360360328510000<br>360360328520000<br>360360328530000<br>360360328540000<br>360360339350000 |

### III. Supplemental Table 3: ICD-10 Codes and Premier Codes Used to Identify Outcomes

| Outcome                | ICD-10 Code | Premier Code                                                                              |
|------------------------|-------------|-------------------------------------------------------------------------------------------|
| Mechanical Ventilation |             | Charge Codes:<br>270270013950000<br>270270057050000<br>270270086600000<br>270270088900000 |

|                         |                                                                                                                                                                                                                                                                                                         |                                                                                                                                                                                                                                                                                                                                                                                                                                                                                                                                          |            |                                                                                                                                                                                                                                                                                                         |                  |                                                                              |
|-------------------------|---------------------------------------------------------------------------------------------------------------------------------------------------------------------------------------------------------------------------------------------------------------------------------------------------------|------------------------------------------------------------------------------------------------------------------------------------------------------------------------------------------------------------------------------------------------------------------------------------------------------------------------------------------------------------------------------------------------------------------------------------------------------------------------------------------------------------------------------------------|------------|---------------------------------------------------------------------------------------------------------------------------------------------------------------------------------------------------------------------------------------------------------------------------------------------------------|------------------|------------------------------------------------------------------------------|
|                         |                                                                                                                                                                                                                                                                                                         | 270270089300000<br>290290093620000<br>410412946560000<br>410412946560001<br>410412946570000<br>410412946570004<br>410412946570005<br>410412946570007<br>410412946570009<br>970976946560000<br>970976946570000                                                                                                                                                                                                                                                                                                                            |            |                                                                                                                                                                                                                                                                                                         |                  |                                                                              |
| Noninvasive Ventilation |                                                                                                                                                                                                                                                                                                         | Charge Codes:<br>270270013920000<br>270270086700000<br>270270106380000<br>270270106390000<br>270270106400000<br>270270990130000<br>410412000060000<br>410412000070000<br>410412000080000<br>410412000090000<br>270270032500000<br>270270087800000<br>410412946600000<br>410412946600001<br>410412946600003<br>410412946600004<br>410412946600005<br>410412946600007<br>410412946600008<br>410412946600009                                                                                                                                |            |                                                                                                                                                                                                                                                                                                         |                  |                                                                              |
| Corticosteroids         |                                                                                                                                                                                                                                                                                                         | Charge Codes:<br><table border="1"> <tr> <td>Prednisone</td> <td>250250054510000,<br/>250250054520000,<br/>250250054530000,<br/>250250054540000,<br/>250250054550000,<br/>250250054560000,<br/>250250054570000,<br/>250250054580000,<br/>250250054590000,<br/>250250054600000,<br/>250250054610000,<br/>250250054620000,<br/>250250068150000,<br/>250888017480000,<br/>250999014690000</td> </tr> <tr> <td>Methylprednisone</td> <td>250250042160000,<br/>250250042170000,<br/>250250042180000,<br/>250250042190000,</td> </tr> </table> | Prednisone | 250250054510000,<br>250250054520000,<br>250250054530000,<br>250250054540000,<br>250250054550000,<br>250250054560000,<br>250250054570000,<br>250250054580000,<br>250250054590000,<br>250250054600000,<br>250250054610000,<br>250250054620000,<br>250250068150000,<br>250888017480000,<br>250999014690000 | Methylprednisone | 250250042160000,<br>250250042170000,<br>250250042180000,<br>250250042190000, |
| Prednisone              | 250250054510000,<br>250250054520000,<br>250250054530000,<br>250250054540000,<br>250250054550000,<br>250250054560000,<br>250250054570000,<br>250250054580000,<br>250250054590000,<br>250250054600000,<br>250250054610000,<br>250250054620000,<br>250250068150000,<br>250888017480000,<br>250999014690000 |                                                                                                                                                                                                                                                                                                                                                                                                                                                                                                                                          |            |                                                                                                                                                                                                                                                                                                         |                  |                                                                              |
| Methylprednisone        | 250250042160000,<br>250250042170000,<br>250250042180000,<br>250250042190000,                                                                                                                                                                                                                            |                                                                                                                                                                                                                                                                                                                                                                                                                                                                                                                                          |            |                                                                                                                                                                                                                                                                                                         |                  |                                                                              |

|  |  |               |                                                                                                                                                                                                                                                                                                                                                                                                                                                                                                                                                                                                                      |  |
|--|--|---------------|----------------------------------------------------------------------------------------------------------------------------------------------------------------------------------------------------------------------------------------------------------------------------------------------------------------------------------------------------------------------------------------------------------------------------------------------------------------------------------------------------------------------------------------------------------------------------------------------------------------------|--|
|  |  |               | 250250042200000,<br>250250042210000,<br>250250042220000,<br>250250042230000,<br>250250042240000,<br>250250042250000,<br>250250042260000,<br>250250042270000,<br>250250042280000,<br>250250042290000,<br>250250042300000,<br>250250042310000,<br>250250042320000,<br>250250042330000,<br>250250042340000,<br>250250042350000,<br>250888013660000,<br>250888013670000,<br>250888013680000,<br>250999011390000,<br>250999011400000,<br>250999011410000                                                                                                                                                                  |  |
|  |  | Dexamethasone | 250250017060000,<br>250250017070000,<br>250250017080000,<br>250250017090000,<br>250250017100000,<br>250250017110000,<br>250250017120000,<br>250250017130000,<br>250250017140000,<br>250250017150000,<br>250250017210000,<br>250250017220000,<br>250250017230000,<br>250250017240000,<br>250250017250000,<br>250250017260000,<br>250250017270000,<br>250250017280000,<br>250250017290000,<br>250250017300000,<br>250250017310000,<br>250250017320000,<br>250250017330000,<br>250250017340000,<br>250250017360000,<br>250250017370000,<br>250250017380000,<br>250250017390000,<br>250250017400000,<br>250250017410000, |  |

|  |  |                |                                                                                                                                                                                                                                                                                                                                                                                                                                                                                                                |  |
|--|--|----------------|----------------------------------------------------------------------------------------------------------------------------------------------------------------------------------------------------------------------------------------------------------------------------------------------------------------------------------------------------------------------------------------------------------------------------------------------------------------------------------------------------------------|--|
|  |  |                | 250250017420000,<br>250250017580000,<br>250250118750000,<br>250250120700000,<br>250888005850000,<br>250888005860000,<br>250999004750000                                                                                                                                                                                                                                                                                                                                                                        |  |
|  |  | Hydrocortisone | 250250031460000<br>250250031470000,<br>250250031480000,<br>250250031490000,<br>250250031510000,<br>250250031520000,<br>250250031530000,<br>250250031540000,<br>250250031550000,<br>250250031560000,<br>250250031570000,<br>250250031580000,<br>250250031590000,<br>250250031750000,<br>250250032030000,<br>250250032040000,<br>250250032050000,<br>250888010260000,<br>250888010270000,<br>250888010280000,<br>250888010290000,<br>250999008270000,<br>250999008280000,<br>250999008290000,<br>250999008300000 |  |
|  |  | Prednisolone   | 250250054170000,<br>250250054180000,<br>250250054190000,<br>250250054200000,<br>250250054210000,<br>250250054220000,<br>250250054230000,<br>250250054240000,<br>250250054250000,<br>250250054260000,<br>250250054270000,<br>250250054310000,<br>250250054320000,<br>250250054410000,<br>250250054420000,<br>250250054430000,<br>250250054640000,<br>250250109680000,<br>250250109690000,<br>250250109700000,                                                                                                   |  |

|                                          |  |                 |                                                                                                                                                                                                                                                                                                                             |  |
|------------------------------------------|--|-----------------|-----------------------------------------------------------------------------------------------------------------------------------------------------------------------------------------------------------------------------------------------------------------------------------------------------------------------------|--|
|                                          |  |                 | 250888017460000,<br>250888017470000,<br>250999014630000                                                                                                                                                                                                                                                                     |  |
|                                          |  | Betamethasone   | 250250006780000,<br>250250006790000,<br>250250006800000,<br>250250007050000,<br>250250007050000,<br>250888002280000,<br>250999001750000,<br>250999001760000                                                                                                                                                                 |  |
|                                          |  | Budesonide      | 250250101300000<br>250250122770000<br>250888002680000                                                                                                                                                                                                                                                                       |  |
|                                          |  | Cortisone       | 250250015760000,<br>250250015770000,<br>250250015780000,<br>250250015790000,<br>250250015800000,<br>250888004950000,<br>250888004960000                                                                                                                                                                                     |  |
|                                          |  | Fludrocortisone | 250250026600000<br>250888008760000<br>250999006910000                                                                                                                                                                                                                                                                       |  |
| Immunomodulatory and Antioxidant Therapy |  | Charge Codes:   |                                                                                                                                                                                                                                                                                                                             |  |
|                                          |  | Azathioprine    | 250250005170000,<br>250250005180000,<br>250250125660000,<br>250250125670000,<br>250888001780000,<br>250888001790000,<br>250999001320000                                                                                                                                                                                     |  |
|                                          |  | Methotrexate    | 250636041640000,<br>250636041650000,<br>250636041660000,<br>250636041670000,<br>250636041680000,<br>250636041690000,<br>250636041700000,<br>250636041710000,<br>250636041720000,<br>250636041730000,<br>250636041740000,<br>250636041750000,<br>250636041760000,<br>250888013440000,<br>250888013450000,<br>250999011220000 |  |
|                                          |  | Mycophenolate   | 250250044960000,<br>250250044970000,<br>250250045200000,<br>250250101660000,                                                                                                                                                                                                                                                |  |

|       |  |                                                                                                  |                                                                                                                                                                                                                                                                                                         |  |
|-------|--|--------------------------------------------------------------------------------------------------|---------------------------------------------------------------------------------------------------------------------------------------------------------------------------------------------------------------------------------------------------------------------------------------------------------|--|
|       |  |                                                                                                  | 250250109470000,<br>250250109480000,<br>250888014380000,<br>250888014390000,<br>250999011990000                                                                                                                                                                                                         |  |
|       |  | Rituximab                                                                                        | 250250129690000,<br>250250131170000,<br>250250131180000,<br>250250131190000,<br>250250132000000,<br>250250132010000,<br>250250132020000,<br>250636057610000,<br>250636057620000,<br>250888018860000,<br>250888027490000,<br>250888027790000,<br>250999015830000                                         |  |
|       |  | Cyclophosphamide                                                                                 | 250636016220000,<br>250636016230000,<br>250636016240000,<br>250636016250000,<br>250636016260000,<br>250636016270000,<br>250636016280000,<br>250636016290000,<br>250636016300000,<br>250636016310000,<br>250636016320000,<br>250636016330000,<br>250888005100000,<br>250888005110000,<br>250999004240000 |  |
|       |  | NAC                                                                                              | 250250000790000,<br>250250121430000                                                                                                                                                                                                                                                                     |  |
| Death |  | Discharge Status Description:<br>20 – Expired<br>41 – Expired, in medical facility (for hospice) |                                                                                                                                                                                                                                                                                                         |  |

**IV. Supplemental Table 4: ICD-10 Codes and Premier-Charge Codes Used to Identify Patient-Level Covariables**

| Covariate                                                             | ICD-10 Code      | Premier Charge Code |
|-----------------------------------------------------------------------|------------------|---------------------|
| Prior Admission with IPF as primary diagnosis within Premier database | J84.111, J84.112 |                     |



|                                            |                                                                                   |                                                                                                                                                                                                           |
|--------------------------------------------|-----------------------------------------------------------------------------------|-----------------------------------------------------------------------------------------------------------------------------------------------------------------------------------------------------------|
| Comorbidities<br>(present on<br>admission) | Alcohol<br>abuse                                                                  | F10.x, E52, G62.1, I42.6, K29.2x, K70.0,<br>K70.3x, K70.9, T51.x, Z71.4x, Z65.8                                                                                                                           |
|                                            | Any tumor                                                                         | C00.x-C26.x, C30.x-C34.x, C37.x-C41.x,<br>C43.x, C45.x-C58.x, C60.x- C75.x, C76.x,<br>C81.x-94.3x, C94.8x, C95.x, C96.0-C96.4,<br>C96.9, C96.A, C96.Z, D45, D89, Z85.46                                   |
|                                            | Cardiac<br>arrhythmias                                                            | I44.0, I44.1, I44.3x-145.2, I45.4-I45.8x,<br>I45.9, I47.x-I49.x, R00.0, R00.1, R00.8,<br>T82.1x, Z45.0x, Z95.0, Z95.810, Z95.818,<br>Z95.9                                                                |
|                                            | Chronic<br>pulmonary<br>disease                                                   | I26.0x, I27.2-I27.9, J40.x-I47.x, J60.x-<br>J67.x, J68.4, J70.1, J70.3                                                                                                                                    |
|                                            | Coagulopathy                                                                      | D65.x-D68.x, D69.1, D69.3- D69.6                                                                                                                                                                          |
|                                            | Complicated<br>diabetes                                                           | E10.2x-E10.8, E11.2x-E11.8, E12.2x-<br>E12.8, E13.2x-E13.8x                                                                                                                                               |
|                                            | Congestive<br>heart failure                                                       | A18.84, I09.9, I11.0, I13.0, I13.2, I25.5,<br>I42.x, I43.x, I50.x, I51.7, P29.0                                                                                                                           |
|                                            | Deficiency<br>anemia                                                              | D50.1-D50.9, D51.x-D53.x, D64.9                                                                                                                                                                           |
|                                            | Dementia                                                                          | F01.x-F03.x, F05, G30.x, G31.01, G31.09,<br>G31.1                                                                                                                                                         |
|                                            | Fluid and<br>electrolyte<br>disorders                                             | E22.2, E86.x, E87.x                                                                                                                                                                                       |
|                                            | Hemiplegia                                                                        | G04.1, G11.4, G80.1, G80.2, G81.x, G82.x,<br>G83.x                                                                                                                                                        |
|                                            | HIV/AIDS                                                                          | B20.x                                                                                                                                                                                                     |
|                                            | Hypertension                                                                      | I10.x, I11.x-I13.x, I15.x, N26.2                                                                                                                                                                          |
|                                            | Liver disease                                                                     | B18.x, I85.x, I86.4, K70.x, K71.1, K71.3-<br>K71.5, K71.7, K72.1x, K72.9.x, K73.x-<br>K74.x, K75.4, K75.81, K76.0, , K76.2-<br>K76.9, Z48.23, Z94.4                                                       |
|                                            | Metastatic<br>cancer                                                              | C45.9, C77.x-C80.x                                                                                                                                                                                        |
|                                            | Peripheral<br>vascular<br>disease                                                 | E08.51, E08.52, E09.51, E09.52, E10.51,<br>E10.52, E11.51, E13.51, E13.52, I67.0,<br>I70.x, I71.x, I73.1, I73.8x, I73.9, I77.1,<br>I77.71- I77.74, I177.79, I79.x, K55.1,<br>K55.8, K55.9, Z95.82x, Z95.9 |
| Psychosis                                  | F20.x, F22-25.x, F28.x, F29.x, F30.x-F33.x,<br>F34.8, F34.9, F39.x, F44.89, F84.3 |                                                                                                                                                                                                           |
| Pulmonary<br>circulation<br>disorders      | I26.x, I27.x, I28.0, I28.8, I28.9                                                 |                                                                                                                                                                                                           |

|                                                |                |                                                                                                                    |  |
|------------------------------------------------|----------------|--------------------------------------------------------------------------------------------------------------------|--|
|                                                | Renal failure  | I12.0, I13.x, N03.2–N03.7, N05.2– N05.7, N18.x, N19.x, N25.0, Z39.32, Z48.22, Z49.0x, Z49.31, Z91.15, Z94.0, Z99.2 |  |
|                                                | Weight loss    | E40.x-E46.x, E64.0, R63.4, R64                                                                                     |  |
| Acute organ dysfunction (present on admission) | Cardiovascular | R579                                                                                                               |  |
|                                                |                | R570                                                                                                               |  |
|                                                |                | R6521                                                                                                              |  |
|                                                |                | R571                                                                                                               |  |
|                                                |                | R578                                                                                                               |  |
|                                                |                | I951                                                                                                               |  |
|                                                |                | I952                                                                                                               |  |
|                                                |                | I953                                                                                                               |  |
|                                                |                | I9581                                                                                                              |  |
|                                                |                | I9589                                                                                                              |  |
|                                                |                | I959                                                                                                               |  |
|                                                | Respiratory    | J96                                                                                                                |  |
|                                                |                | R0603                                                                                                              |  |
|                                                |                | R092                                                                                                               |  |
|                                                |                | 5A1935Z                                                                                                            |  |
|                                                |                | 5A1945Z                                                                                                            |  |
|                                                |                | 5A1955Z                                                                                                            |  |
|                                                | Neurologic     | G9340                                                                                                              |  |
|                                                |                | G9341                                                                                                              |  |
|                                                |                | G9349                                                                                                              |  |
|                                                |                | I6783                                                                                                              |  |
|                                                |                | F05                                                                                                                |  |
|                                                |                | F062                                                                                                               |  |
|                                                |                | F060                                                                                                               |  |
|                                                |                | F0630                                                                                                              |  |
|                                                |                | F0631                                                                                                              |  |
|                                                |                | F0632                                                                                                              |  |
|                                                |                | F0633                                                                                                              |  |
|                                                |                | F0634                                                                                                              |  |
|                                                |                | F064                                                                                                               |  |
|                                                |                | F061                                                                                                               |  |
|                                                |                | F53                                                                                                                |  |
|                                                |                | F068                                                                                                               |  |
|                                                | G931           |                                                                                                                    |  |
| Hematologic                                    | D6959          |                                                                                                                    |  |

|                                       |         |       |                                                                                                                                                                                                                                                                                           |
|---------------------------------------|---------|-------|-------------------------------------------------------------------------------------------------------------------------------------------------------------------------------------------------------------------------------------------------------------------------------------------|
|                                       |         | D6951 |                                                                                                                                                                                                                                                                                           |
|                                       |         | D696  |                                                                                                                                                                                                                                                                                           |
|                                       |         | D65   |                                                                                                                                                                                                                                                                                           |
|                                       |         | D688  |                                                                                                                                                                                                                                                                                           |
|                                       |         | D689  |                                                                                                                                                                                                                                                                                           |
|                                       | Hepatic | K7200 |                                                                                                                                                                                                                                                                                           |
|                                       |         | K7201 |                                                                                                                                                                                                                                                                                           |
|                                       |         | K762  |                                                                                                                                                                                                                                                                                           |
|                                       |         | K763  |                                                                                                                                                                                                                                                                                           |
|                                       | Renal   | N170  |                                                                                                                                                                                                                                                                                           |
|                                       |         | N171  |                                                                                                                                                                                                                                                                                           |
|                                       |         | N172  |                                                                                                                                                                                                                                                                                           |
|                                       |         | N178  |                                                                                                                                                                                                                                                                                           |
|                                       |         | N179  |                                                                                                                                                                                                                                                                                           |
| MV within first 24 hours of admission |         |       | 270270013950000<br>270270057050000<br>270270086600000<br>270270088900000<br>270270089300000<br>290290093620000<br>410412946560000<br>410412946560001<br>410412946570000<br>410412946570004<br>410412946570005<br>410412946570007<br>410412946570009<br>970976946560000<br>970976946570000 |

**V. Supplemental Table 5: ICD-10 Codes and Premier-Charge Codes Used to Identify Hospital-Level Covariables**

| Covariate              | Definition                                                                                           | ICD-10 Code                                                    | Premier Codes                                                                                                                                                                                               |
|------------------------|------------------------------------------------------------------------------------------------------|----------------------------------------------------------------|-------------------------------------------------------------------------------------------------------------------------------------------------------------------------------------------------------------|
| Lung Transplant Center | Centers with any charge for an ICD-10 procedure or Premier                                           | OBYK0Z0<br>OBYK0Z1<br>OBYL0Z0<br>OBYL0Z1<br>OBYM0Z0<br>OBYM0Z1 | Charge Codes:<br>360490328510000<br>360490328520000<br>360490328530000<br>360490328540000<br>360490339350000<br>360360328510000<br>360360328520000<br>360360328530000<br>360360328540000<br>360360339350000 |
| Safety-Net Hospital    | Hospitals in highest quartile per US region, ranked by proportion of Medicaid and uninsured patients |                                                                | Standard payor codes:<br>330<br>340<br>350                                                                                                                                                                  |

|  |  |  |     |
|--|--|--|-----|
|  |  |  | 390 |
|  |  |  | 400 |
|  |  |  | 410 |

## Appendix 2: Formulas Used for Hierarchical Modelling

### I. Median Odds Ratio

$$MOR = \exp[(\sqrt{2 \times V_A}) \times 0.6745] \approx \exp(0.95\sqrt{V_A})$$

$V_A$ = area level variance

### II. Intraclass Correlation Coefficient

$$ICC = \frac{V_A}{(V_A + 3.29)}$$

$V_A$ = area level variance

### III. Proportional Change in Variance

$$PCV = \frac{(V_A - V_B)}{(V_A)} \times 100$$

$V_A$ = variance of the initial model

$V_B$ = variance of the model with more terms

**Appendix 3: Consort Diagram**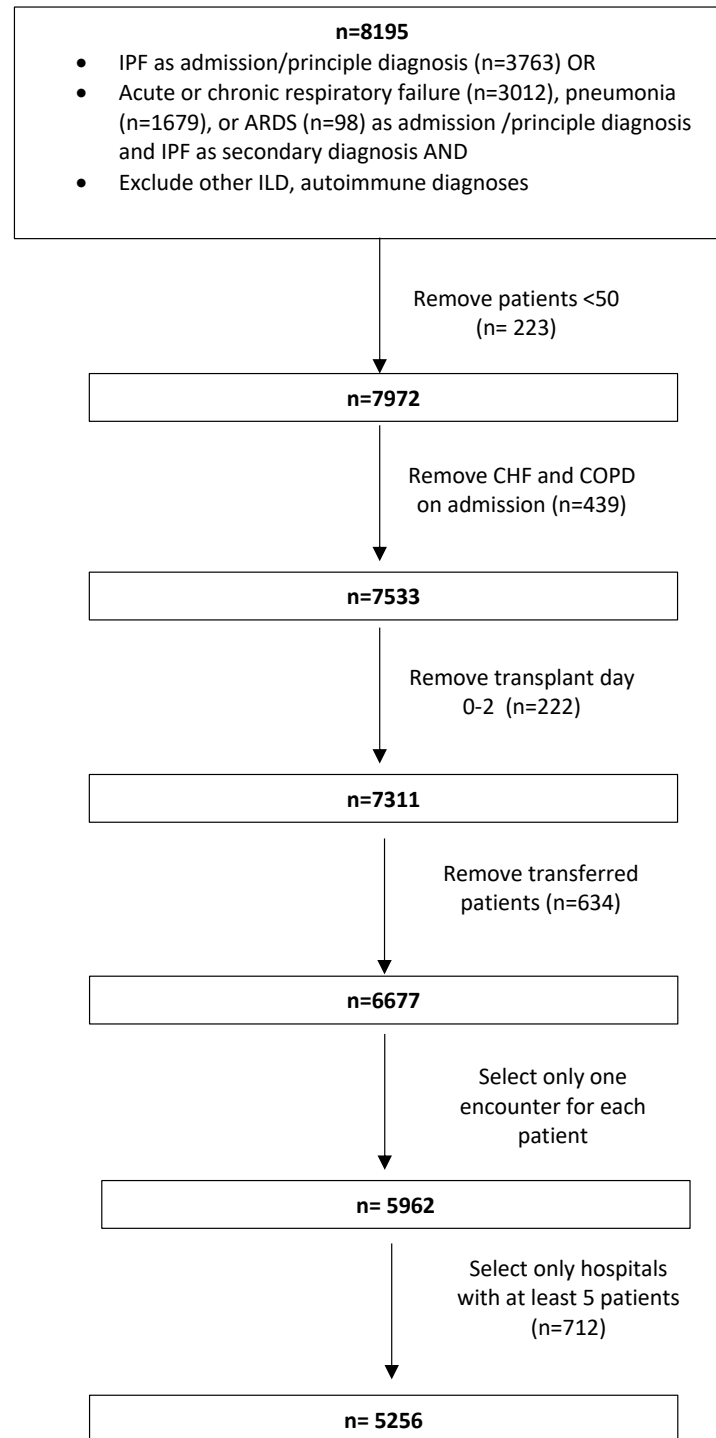

**Appendix 4: Associations between exposures and outcomes in severe IPF exacerbations****I. Supplemental Table 1: Adjusted Odds Ratios for Practices in Severe IPF Exacerbations**

| Variable                                                  | Mechanical Ventilation<br>aOR (95% CI) | Noninvasive<br>Ventilation<br>aOR (95% CI) | Corticosteroid<br>aOR (95% CI)** | Adjunctive<br>Medications<br>aOR (95% CI)** |
|-----------------------------------------------------------|----------------------------------------|--------------------------------------------|----------------------------------|---------------------------------------------|
| Intercept                                                 | 0.11 (0.07-0.18)                       | 0.41 (0.27-0.61)                           | 3.69 (2.24-6.09)                 | 0.03 (0.01-0.07)                            |
| Lung Transplant Center                                    | 0.91 (0.46-1.81)                       | 0.63 (0.36-1.13)                           | 0.56 (0.33-0.96)                 | 3.70 (2.02-6.77)                            |
| Age                                                       | 0.69 (0.63-0.76)                       | 0.82 (0.76-0.89)                           | 0.69 (0.62-0.77)                 | 0.54 (0.46-0.64)                            |
| Female (ref=Male)                                         | 0.82 (0.70-0.97)                       | 0.89 (0.78-1.01)                           | 0.97 (0.81-1.16)                 | 1.53 (1.17-2.01)                            |
| Asian (ref=white)                                         | 1.15 (0.69-1.90)                       | 1.11 (0.74-1.65)                           | 1.05 (0.62-1.78)                 | 1.62 (0.84-3.10)                            |
| Black (ref=white)                                         | 1.05 (0.77-1.44)                       | 1.01 (0.77-1.31)                           | 0.90 (0.63-1.29)                 | 0.89 (0.53-1.48)                            |
| Other Race (ref=white)                                    | 1.34 (0.95-1.87)                       | 1.2 (0.91-1.58)                            | 1.00 (0.69-1.46)                 | 1.13 (0.69-1.88)                            |
| Unknown Race (ref=white)                                  | 1.07 (0.62-1.83)                       | 1.02 (0.66-1.60)                           | 0.85 (0.49-1.48)                 | 0.61 (0.23-1.65)                            |
| Hispanic (ref= non-Hispanic)                              | 1.20 (0.86-1.68)                       | 1.09 (0.84-1.42)                           | 1.07 (0.76-1.51)                 | 1.16 (0.69-1.96)                            |
| Unknown Hispanic (ref= non-Hispanic)                      | 1.15 (0.77-1.72)                       | 1.26 (0.91-1.73)                           | 1.09 (0.73-1.62)                 | 1.30 (0.72-2.35)                            |
| Non-teaching hospital (ref=teaching hospital)             | 0.64 (0.48-0.84)                       | 1.05 (0.84-1.32)                           | 1.29 (1.01-1.64)                 | 0.83 (0.59-1.15)                            |
| Midwest Region (ref=South)                                | 0.61 (0.44-0.86)                       | 0.92 (0.71-1.20)                           | 0.88 (0.66-1.18)                 | 0.69 (0.44-1.07)                            |
| Northeast Region (ref=South)                              | 0.89 (0.59-1.36)                       | 1.06 (0.76-1.49)                           | 0.96 (0.66-1.38)                 | 1.16 (0.71-1.91)                            |
| West Region (ref=South)                                   | 0.92 (0.64-1.33)                       | 0.67 (0.50-0.91)                           | 0.93 (0.67-1.3)                  | 1.12 (0.72-1.75)                            |
| Medicaid or uninsured (ref=private)                       | 0.93 (0.64-1.36)                       | 0.88 (0.64-1.21)                           | 1.09 (0.69-1.72)                 | 0.55 (0.30-1.02)                            |
| Medicare (ref=private)                                    | 0.94 (0.73-1.21)                       | 0.98 (0.80-1.21)                           | 1.49 (1.11-1.99)                 | 1.01 (0.69-1.49)                            |
| Other insurance (ref=private)                             | 1.02 (0.61-1.68)                       | 0.93 (0.61-1.42)                           | 1.47 (0.80-2.71)                 | 0.81 (0.34-1.91)                            |
| Acute organ dysfunction: cardiovascular                   | 3.26 (2.56-4.17)                       | 1.03 (0.83-1.29)                           | 0.53 (0.40-0.71)                 | 0.67 (0.40-1.14)                            |
| Acute organ dysfunction: respiratory                      | 1.78 (1.47-2.15)                       | 1.14 (0.98-1.34)                           | 1.21 (0.97-1.52)                 | 1.10 (0.78-1.53)                            |
| Acute organ dysfunction: neurologic                       | 2.85 (2.07-3.91)                       | 1.02 (0.77-1.35)                           | 0.59 (0.42-0.84)                 | 1.59 (0.90-2.81)                            |
| Acute organ dysfunction: hematologic                      | 0.82 (0.40-1.72)                       | 1.13 (0.60-2.12)                           | 0.41 (0.14-1.22)                 | 0.31 (0.09-0.99)                            |
| Acute organ dysfunction: hepatic                          | 5.87 (1.39-24.85)                      | 0.59 (0.18-1.91)                           | 2.82 (0.34-23.19)                | 0.98 (0.11-8.86)                            |
| Acute organ dysfunction: renal                            | 1.52 (1.21-1.90)                       | 1.26 (1.04-1.52)                           | 1.06 (0.82-1.37)                 | 1.21 (0.82-1.78)                            |
| Mechanical ventilation within first 24 hours of admission | *                                      | *                                          | 1.12 (0.81-1.55)                 | 1.31 (0.84-2.03)                            |
| Safety-net hospital in region                             | 1.28 (0.95-1.73)                       | 1.07 (0.84-1.37)                           | 0.80 (0.62-1.03)                 | 0.57 (0.38-0.84)                            |
| Comorbidity: Alcohol Abuse                                | 0.88 (0.49-1.58)                       | 1.11 (0.69-1.80)                           | 0.63 (0.34-1.16)                 | 0.68 (0.23-1.99)                            |
| Comorbidity: Any tumor                                    | 1.28 (0.92-1.77)                       | 1.20 (0.92-1.56)                           | 0.83 (0.58-1.18)                 | 0.46 (0.21-0.99)                            |
| Comorbidity: cardiac arrhythmia                           | 1.14 (0.96-1.36)                       | 1.26 (1.10-1.44)                           | 1.07 (0.89-1.29)                 | 1.13 (0.84-1.53)                            |
| Comorbidity: chronic pulmonary disease                    | 1.07 (0.88-1.30)                       | 1.29 (1.11-1.50)                           | 1.52 (1.24-1.86)                 | 0.64 (0.46-0.89)                            |

|                                              |                  |                  |                  |                   |
|----------------------------------------------|------------------|------------------|------------------|-------------------|
| Comorbidity: coagulopathy                    | 1.78 (0.91-3.51) | 1.14 (0.64-2.05) | 2.16 (0.76-6.18) | 2.20 (0.81-5.99)  |
| Comorbidity: complicated diabetes            | 1.36 (1.11-1.66) | 1.14 (0.97-1.35) | 1.23 (0.97-1.56) | 1.09 (0.78-1.52)  |
| Comorbidity: congestive heart failure        | 1.23 (1.03-1.46) | 1.23 (1.08-1.41) | 1.03 (0.85-1.24) | 0.90 (0.67-1.20)  |
| Comorbidity: deficiency anemia               | 1.32 (1.07-1.62) | 1.06 (0.90-1.25) | 1.11 (0.88-1.41) | 1.34 (0.95-1.87)  |
| Comorbidity: dementia                        | 0.87 (0.60-1.25) | 0.96 (0.72-1.27) | 0.78 (0.56-1.09) | 1.01 (0.50-2.03)  |
| Comorbidity: fluid and electrolyte disorders | 1.44 (1.22-1.69) | 1.28 (1.13-1.46) | 1.32 (1.09-1.59) | 1.22 (0.93-1.60)  |
| Comorbidity: HIV/AIDS                        | 0.43 (0.08-2.42) | 0.21 (0.04-1.22) | 0.90 (0.10-7.71) | ***               |
| Comorbidity: hemiplegia                      | 1.92 (0.55-6.71) | 2.25 (0.67-7.55) | 0.85 (0.18-4.06) | 2.62 (0.51-13.35) |
| Comorbidity: hypertension                    | 1.10 (0.92-1.32) | 1.07 (0.93-1.23) | 1.09 (0.90-1.33) | 1.08 (0.80-1.46)  |
| Comorbidity: liver disease                   | 1.19 (0.82-1.73) | 1.05 (0.76-1.44) | 0.85 (0.55-1.31) | 1.35 (0.74-2.48)  |
| Comorbidity: metastatic cancer               | 0.61 (0.34-1.09) | 0.88 (0.56-1.39) | 0.92 (0.50-1.68) | 1.14 (0.36-3.64)  |
| Comorbidity: peripheral vascular disease     | 1.02 (0.77-1.34) | 0.93 (0.75-1.16) | 0.86 (0.64-1.16) | 0.85 (0.50-1.44)  |
| Comorbidity: psychosis                       | 0.90 (0.73-1.11) | 1.18 (0.99-1.39) | 1.14 (0.89-1.45) | 0.84 (0.59-1.21)  |
| Comorbidity: pulmonary circulatory disorder  | 1.06 (0.88-1.27) | 1.09 (0.94-1.26) | 0.98 (0.80-1.22) | 1.32 (0.94-1.84)  |
| Comorbidity: renal failure                   | 0.72 (0.58-0.91) | 0.90 (0.76-1.08) | 0.71 (0.56-0.89) | 1.54 (1.06-2.22)  |
| Comorbidity: weight loss                     | 1.44 (1.16-1.79) | 1.22 (1.02-1.45) | 0.94 (0.74-1.19) | 0.84 (0.56-1.27)  |
| Prior IPF admission                          | 0.69 (0.42-1.13) | 0.70 (0.48-1.01) | 1.40 (0.81-2.42) | 1.11 (0.55-2.23)  |

\* Mechanical ventilation present on admission was not included as a covariable in model for use of mechanical ventilation

\*\*Patients who received a transplant during index hospitalization were not included in model for steroids or immunosuppressive/antioxidant use

\*\*\*HIV/AIDS was removed as a covariate from the immunosuppressive/antioxidant model to allow for model convergence



## II. Supplemental Table 2: Adjusted Odds Ratios for Mortality in Severe IPF Exacerbations

| Variable                                                  | Mortality (all patients) aOR (95% CI) | Mortality (MV patients) aOR (95% CI) |
|-----------------------------------------------------------|---------------------------------------|--------------------------------------|
| Intercept                                                 | 0.12 (0.08-0.20)                      | 1.1 (0.51-2.37)                      |
| Lung Transplant Center                                    | 0.81 (0.49-1.33)                      | 0.43 (0.22-0.85)                     |
| Age                                                       | 0.97 (0.88-1.06)                      | 1.06 (0.89-1.27)                     |
| Female (ref=Male)                                         | 0.89 (0.76-1.04)                      | 0.81 (0.61-1.08)                     |
| Asian (ref=white)                                         | 1.19 (0.76-1.86)                      | 0.51 (0.21-1.21)                     |
| Black (ref=white)                                         | 0.77 (0.56-1.06)                      | 0.86 (0.51-1.43)                     |
| Other Race (ref=white)                                    | 1.02 (0.74-1.42)                      | 0.81 (0.47-1.41)                     |
| Unknown Race (ref=white)                                  | 1.72 (1.05-2.80)                      | 3.17 (1.17-8.58)                     |
| Hispanic (ref= non-Hispanic)                              | 1.38 (1.00-1.91)                      | 1.49 (0.88-2.54)                     |
| Unknown Hispanic (ref= non-Hispanic)                      | 1.07 (0.74-1.56)                      | 1.06 (0.57-1.97)                     |
| Non-teaching hospital (ref=teaching hospital)             | 0.73 (0.59-0.89)                      | 0.80 (0.57-1.11)                     |
| Midwest Region (ref=South)                                | 0.93 (0.72-1.20)                      | 1.20 (0.79-1.83)                     |
| Northeast Region (ref=South)                              | 1.22 (0.89-1.67)                      | 1.33 (0.79-2.24)                     |
| West Region (ref=South)                                   | 1.14 (0.86-1.50)                      | 1.13 (0.72-1.77)                     |
| Medicaid or uninsured (ref=private)                       | 1.22 (0.84-1.76)                      | 1.18 (0.63-2.22)                     |
| Medicare (ref=private)                                    | 0.89 (0.69-1.15)                      | 0.98 (0.63-1.52)                     |
| Other insurance (ref=private)                             | 1.33 (0.83-2.15)                      | 0.66 (0.28-1.55)                     |
| Acute organ dysfunction: cardiovascular                   | 1.69 (1.33-2.14)                      | 1.79 (1.23-2.59)                     |
| Acute organ dysfunction: respiratory                      | 1.39 (1.16-1.68)                      | 1.40 (1.02-1.92)                     |
| Acute organ dysfunction: neurologic                       | 1.56 (1.14-2.13)                      | 1.08 (0.68-1.74)                     |
| Acute organ dysfunction: hematologic                      | 1.37 (0.67-2.83)                      | 1.35 (0.39-4.67)                     |
| Acute organ dysfunction: hepatic                          | 4.00 (1.05-15.25)                     | 4.00 (0.76-21.08)                    |
| Acute organ dysfunction: renal                            | 1.48 (1.20-1.82)                      | 1.27 (0.88-1.82)                     |
| Mechanical ventilation within first 24 hours of admission | 2.59 (2.05-3.27)                      | 0.49 (0.37-0.66)                     |
| Safety-net hospital in region                             | 0.82 (0.65-1.03)                      | 0.88 (0.62-1.25)                     |
| Comorbidity: Alcohol Abuse                                | 1.15 (0.66-2.00)                      | 0.87 (0.34-2.26)                     |
| Comorbidity: any tumor                                    | 1.38 (1.02-1.86)                      | 1.05 (0.60-1.84)                     |
| Comorbidity: cardiac arrhythmia                           | 1.32 (1.12-1.55)                      | 0.89 (0.66-1.19)                     |
| Comorbidity: chronic pulmonary disease                    | 0.87 (0.72-1.05)                      | 0.96 (0.68-1.35)                     |
| Comorbidity: coagulopathy                                 | 1.08 (0.55-2.11)                      | 0.91 (0.29-2.89)                     |

|                                              |                  |                   |
|----------------------------------------------|------------------|-------------------|
| Comorbidity: complicated diabetes            | 0.94 (0.77-1.15) | 1.21 (0.87-1.68)  |
| Comorbidity: congestive heart failure        | 1.09 (0.92-1.28) | 0.94 (0.70-1.26)  |
| Comorbidity: deficiency anemia               | 0.94 (0.77-1.15) | 0.95 (0.67-1.33)  |
| Comorbidity: dementia                        | 0.67 (0.47-0.96) | 0.36 (0.19-0.71)  |
| Comorbidity: fluid and electrolyte disorders | 1.36 (1.17-1.59) | 1.07 (0.80-1.42)  |
| Comorbidity: HIV/AIDS                        | 0.48 (0.05-4.45) | 0.43 (0.02-10.01) |
| Comorbidity: hemiplegia                      | 2.66 (0.81-8.72) | 1.31 (0.20-8.44)  |
| Comorbidity: hypertension                    | 1.12 (0.95-1.34) | 0.94 (0.68-1.29)  |
| Comorbidity: liver disease                   | 0.88 (0.60-1.30) | 0.63 (0.34-1.15)  |
| Comorbidity: metastatic cancer               | 0.80 (0.47-1.35) | 0.56 (0.21-1.53)  |
| Comorbidity: peripheral vascular disease     | 0.97 (0.74-1.26) | 0.62 (0.38-1.00)  |
| Comorbidity: psychosis                       | 0.98 (0.80-1.20) | 0.88 (0.61-1.27)  |
| Comorbidity: pulmonary circulatory disorder  | 1.42 (1.19-1.70) | 1.09 (0.79-1.51)  |
| Comorbidity: renal failure                   | 0.82 (0.67-1.02) | 0.95 (0.65-1.39)  |
| Comorbidity: weight loss                     | 1.61 (1.32-1.96) | 1.44 (0.99-2.08)  |
| Prior IPF admission                          | 0.51 (0.29-0.88) | 0.28 (0.10-0.82)  |

**Appendix 5: Sensitivity Analysis with Primary or Admitting Diagnosis of IPF (J84.111 or J84.112, n=2382 patients)**

| Analysis                       | Number of Patients (%) | Median rate (IQR)  | ICC (95% CI)       |
|--------------------------------|------------------------|--------------------|--------------------|
| Mechanical Ventilation         | 364 (15)               | 10.7% (6.4-18.3%)  | 15.7% (14.0-17.4%) |
| Noninvasive Ventilation        | 879 (37)               | 34.8% (25.3-46.3%) | 14.2% (12.0-15.5%) |
| Corticosteroid                 | 2040 (87)              | 90.8 (83.7-94.8%)  | 12.9% (11.2-13.5%) |
| Immunosuppression/Antioxidants | 124 (5.3)              | 3.1% (1.6-5.7%)    | 10.2% (8.6%-11.7%) |
| Mortality                      | 394 (17)               | 12.7% (8.2%-20.1%) | 9.2% (7.6%-10.6%)  |
